tency ratio to be 1:10. Only a cost comparison taking into account this potency difference would be valid.

TONI MARINA  
Product Director  
Anesthesia Products  
Janssen Pharmaceutica  
40 Kingsbridge Road  
Piscataway, New Jersey 08854

Anesthesiology  
64:843, 1986

### Cost of Different Narcotics

*To the Editor:*—After reading Dr. Aldrete's letter,<sup>1</sup> I reviewed the cost to our hospital of both fentanyl and sufentanil. The issue is important because we use large doses of narcotic for anesthetizing cardiac surgery patients.

A 20-ml ampul of fentanyl (Sublimaze®) costs the hospital \$10.59. A 5-ml ampul of sufentanil (Sufenta®) costs \$12.61. Simple arithmetic shows that 100 µg of fentanyl costs \$1.059. An equivalent dose of sufentanil (15 µg) costs \$0.7566.

I fail to comprehend Dr. Aldrete's assertion that sufentanil is 3.2 times as expensive as fentanyl.

Anesthesiology  
64:843, 1986

*In reply:*—A clarification is in order concerning the calculated costs of fentanyl and sufentanil published as "Correspondence" in ANESTHESIOLOGY 63:656, 1985.

Because of the supposed ratio of potency of 1:5 between sufentanil and fentanyl, if one ampul of 5 ml of fentanyl (250 µg) costs \$3.37, the equivalent dose of sufentanil would be 50 µg, which costs \$3.72. Thus, the stated 3.2:1 times ratio, the latter allegedly being more expensive,

- #### REFERENCES
1. Aldrete JA: Narcotic anesthesia: Do the benefits justify the cost? ANESTHESIOLOGY 63:565–566, 1985
  2. Flacke JW, Bloor BC, Kripke BJ, Flacke WE, Warneck CM, Van Etten AP, Wong DH, Katz RL: Comparison of morphine, meperidine, fentanyl and sufentanil in balanced anesthesia: A double-blind study. Anesth Analg 44:897–910, 1985
  3. Smith NT, Quinn M, Dec-Silver H, Sanford TJ: Aperiodic analysis of EEG response to fentanyl and sufentanil anesthesia during open heart surgery (abstract). Anesth Analg 62:284, 1983

(Accepted for publication January 22, 1986.)

THOMAS A. POLTA, M.D.  
Staff Anesthesiologist  
Veterans Administration Medical Center  
54th Street and 48th Avenue South  
Minneapolis, Minnesota 55417

#### REFERENCE

1. Aldrete JA: Narcotic anesthesia: Do the benefits justify the cost? ANESTHESIOLOGY 63:565–566, 1985

(Accepted for publication January 22, 1986.)

should in fact be only 1.1:1; in other words, and for practical reasons, they cost about the same.

J. ANTONIO ALDRETE  
Department of Anesthesiology  
The University of Alabama at Birmingham  
University Station  
Birmingham, Alabama 35294

(Accepted for publication January 22, 1986.)
